# Supplementary material
Source: HighWire-hosted journal article supplement (https://cmajopen.ca/highwire/filestream/87586/field_highwire_adjunct_files/0/open-2020-0268-1-at.pdf)
Supplement: open-2020-0268-1-at.pdf [file open-2020-0268-1-at.pdf]

## Appendix 1. Supplementary material

**Figure S1. Kaplan-Meier survival estimates for medications used in MAiD**

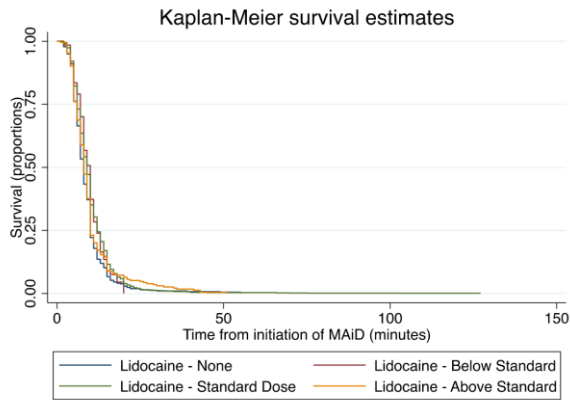

$p = 0.0001$

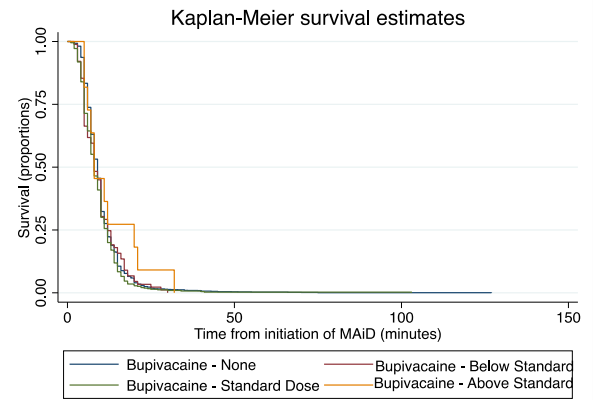

$p = 0.017$

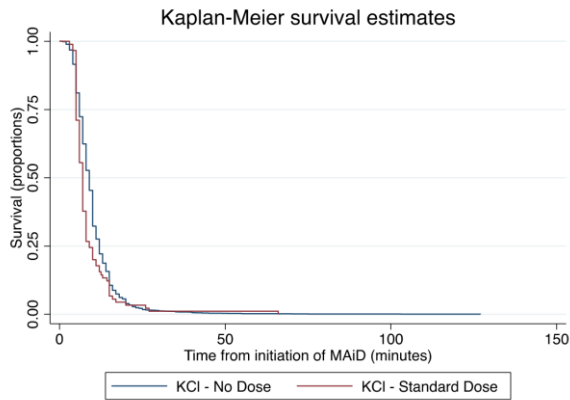

$p = 0.3$

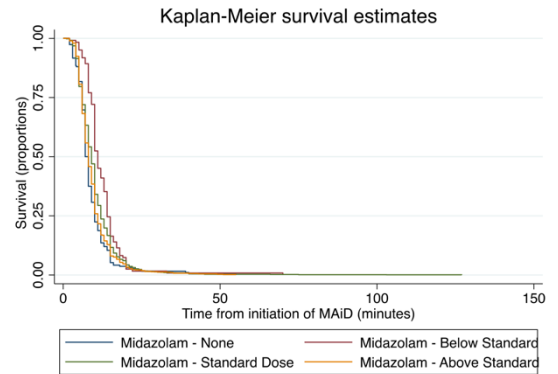

$p < 0.001$

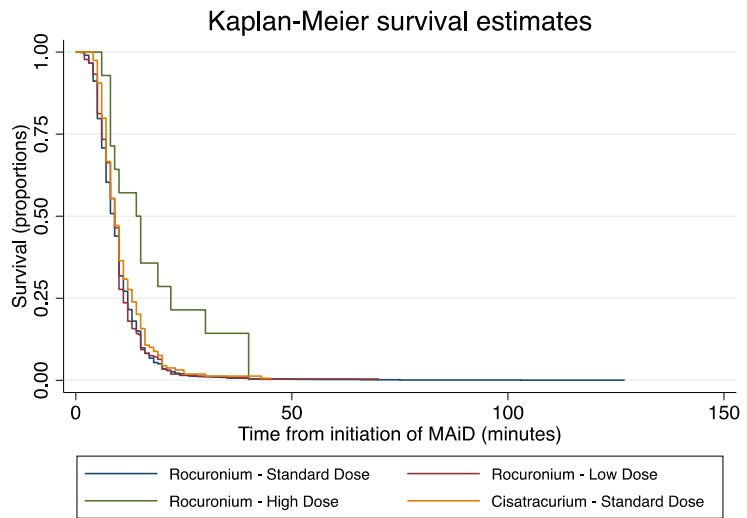

$p = 0.0022$

| <b>Table S1. Sensitivity Analysis: Multivariable Adjusted Hazard Ratios for Time to Death</b> |                           |         |            |
|-----------------------------------------------------------------------------------------------|---------------------------|---------|------------|
|                                                                                               | Hazard Ratio              | P       | 95% CI     |
| <b>Lidocaine (ref = no dose)</b>                                                              |                           |         |            |
| Low dose                                                                                      | 0.8                       | 0.107   | 0.6 to 1   |
| Standard dose                                                                                 | 0.7                       | < 0.001 | 0.6 to 0.8 |
| High dose                                                                                     | 0.7                       | < 0.001 | 0.6 to 0.9 |
| <b>Propofol (ref = Low dose)</b>                                                              |                           |         |            |
| No dose                                                                                       | Insufficient observations |         |            |
| Standard dose                                                                                 | 1.1                       | 0.343   | 0.9 to 1.2 |
| High dose                                                                                     | 0.4                       | < 0.001 | 0.3 to 0.5 |
| <b>Paralytic (ref = Rocuronium standard dose)</b>                                             |                           |         |            |
| <b>Rocuronium</b>                                                                             |                           |         |            |
| Low dose                                                                                      | 1.0                       | 0.800   | 0.9 to 1.1 |
| High dose                                                                                     | 0.4                       | < 0.001 | 0.2 to 0.6 |
| <b>Cisatracurium</b>                                                                          |                           |         |            |
| Standard dose                                                                                 | 0.9                       | 0.295   | 0.8 to 1.1 |
| Low dose                                                                                      | 0.7                       | 0.728   | 0.1 to 5   |
| High dose                                                                                     | 0.4                       | 0.075   | 0.1 to 1.1 |
|                                                                                               |                           |         |            |

|                                           |     |         |            |
|-------------------------------------------|-----|---------|------------|
| <b>Bupivacaine (ref = no dose)</b>        |     |         |            |
| Low dose                                  | 1.0 | 0.885   | 0.8 to 1.2 |
| Standard dose                             | 1.2 | 0.001   | 1.1 to 1.4 |
| High dose                                 | 0.6 | 0.083   | 0.3 to 1.1 |
|                                           |     |         |            |
| <b>Potassium Chloride (ref = no dose)</b> |     |         |            |
| Low dose                                  | 1.3 | 0.626   | 0.5 to 3.4 |
| Standard dose                             | 1.5 | < 0.001 | 1.2 to 1.9 |
| High dose                                 | 0.6 | 0.285   | 0.3 to 1.5 |
